# Supplementary material for: Effect of Sodium on Methanogens in a Two-Stage Anaerobic System
Source: MDPI journal article supplement (doi:10.3390/app12030956), 2022-01-18
Supplement: s1 [file s1]

Archive with 1 entries (1 files):
- applsci-1529676-supplementary.pdf
