# Supplementary material for: Effect of Sodium on Methanogens in a Two-Stage Anaerobic System
Source: MDPI journal article supplement (doi:10.3390/app12030956), 2022-01-18
Supplement: s1 [file s1 › applsci-1529676-supplementary.pdf]

## Effect of sodium on methanogens in a two-stage anaerobic

Keke Xiao <sup>1,2,3</sup>, Yogananda Maspolim <sup>2,3</sup>, Yan Zhou <sup>2</sup>, Chenghong Guo <sup>2,3,\*</sup> and Wun Jern Ng <sup>2,3,\*</sup>

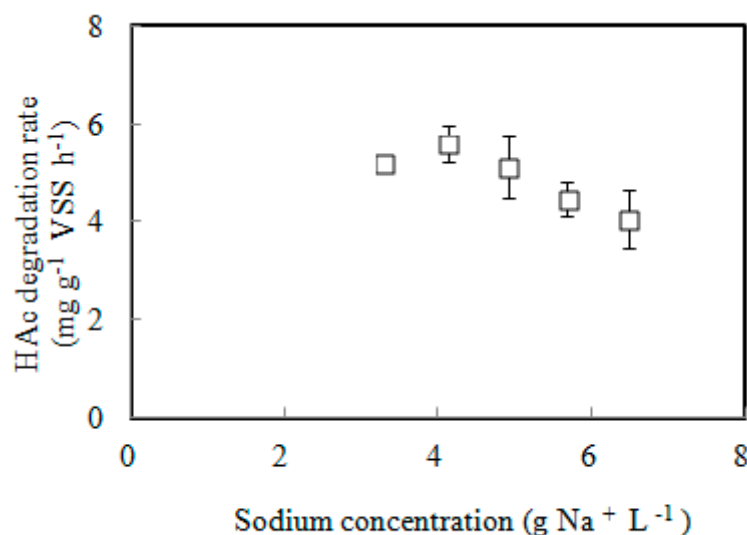

**Figure S1.** HAc degradation rate by methanogens from the second-stage reactor at different initial added sodium concentrations without centrifugation of the biomass.

Without centrifugating the biomass, the methanogens from the second-stage reactor were not obviously inhibited at sodium concentration of up to 5.08 g Na<sup>+</sup> L<sup>-1</sup>, and was only 14.51% and 22.40% inhibited at sodium concentrations of 5.84 g Na<sup>+</sup> L<sup>-1</sup> and 6.65 g Na<sup>+</sup> L<sup>-1</sup>, respectively.
